# Supplementary material
Source: publisher site journal article supplement (https://www.dovepress.com/article/430586)
Supplement: Supplementary file 1 [file get_supplementary_file.php]

**Supplementary materials**

Supplementary Table 1 Demographic and clinical information of the patients

| Patients | Gender | | Age | Diagnosis | Costa | Prognosisb | Used antibioticsc | Compound bacteria | WBC | CRP | N  (%) |
| --- | --- | --- | --- | --- | --- | --- | --- | --- | --- | --- | --- |
| P1 | | M | 58 | Myelodysplastic syndrome | 29.8 | I | TZP/SMZ/LEV | *-* | 0.6 | 3.67 | 93.7 |
| P2 | | M | 75 | Pancreatic cancer  Obstructive aundice | 2.2 | I | SCF/CAZ | *K.pneumoniae* | 5.6 | 29.5 | 76.9 |
| P3 | | F | 67 | Acute myeloid leukemia | 2.4 | I | LEV | *-* | 3 | 5.5 | 62.2 |
| P4 | | F | 90 | Colon cancer | 5.5 | R | AZM/AMC/CRO/LZD/PRL | *-* | 6.7 | 15 | 73.8 |
| P5 | | M | 58 | Myelofibrosis  Hepatitis B  Diabetes insipidus | 9.2 | R | TZP/DAP/TEC | *S.aureus* | 3.2 | 21.5 | 80.6 |
| P6 | | F | 64 | Choledocholithiasis | 4.2 | I | CAZ | *E.asburiae* | 5.2 | 19.8 | 76.6 |
| P7 | | M | 58 | Myelofibrosis | 9.2 | R | TZP/DAP/TEC/CXM | *S.aureus* | 3.1 | 30 | 73.85 |
| P8 | | M | 74 | Cholecystolithiasis | 2.9 | I | SCF | *-* | 16.5 | 96 | 93.3 |
| P9 | | M | 74 | CholedocholithiasisCardiac insufficiency | 8.8 | I | SCF/MTZ | *M.morganii*  *K.pneumoniae* | 4.9 | 60 | 71.4 |
| P10 | | F | 30 | Acute myeloid leukemia | 36.7 | I | SCF/MEM/LZD/TGC/ETM |  | 13 | 81 | 85.6 |
| P11 | | M | 78 | Renal cyst  Benign prostatic hyperplasia | 3.1 | R | MOX | *-* | - | - | - |
| P12 | | M | 1 | Congenital agranulocytosis  Hypothyroidism | 1.3 | I | AZM/AMC/CRO/LZD/PRL | *P.aeruginosa* | 4.6 | 23 | 10 |
| P13 | | M | 74 | Cholangiocarcinoma | 9 | I | TZP | *K.pneumoniae* | 9.3 | 188 | 83 |
| P14 | | F | 62 | Glioma | 3.5 | D | TZP/MEM/FLU/LEV/VA/DAP | *P.aeruginosa*  *Enter.faecium* | 13.03 | >160 | 87.07 |
| P15 | | M | 39 | Colon cancer | 20.4 | D | SCF/LEV | *K.pneumoniae* | 13.1 | >160 | 94 |
| P16 | | M | 75 | Choledocholithiasis | 12.4 | R | TZP | *-* | 5.6 |  | 75.5 |
| P17 | | M | 74 | Cholelithiasis cholecystolithiasis | 6 | I | CAZ | *-* | 7.1 | 50 | 82.5 |
| P18 | | F | 83 | Pancreas Cancer  Cholelithiasis cholecystolithiasis | 48.8 | I | CAZ | *Enter.avium*  *K.pneumoniae* | 17.1 | 208 | 87.4 |
| P19 | | M | 75 | Choledocholithiasis | 12.4 | R | TZP/MOX | *Enter.faecium* | 17.8 |  | 93.9 |
| P20 | | F | 47 | Choledocholithiasis | 22.3 | R | MEM/CAZ | *K.oxytoca* | 7.2 |  | 66.2 |
| P21 | | M | 84 | Choledocholithiasis with acute cholangitis | 3.1 | R | CAZ | *-* | 4.9 | 7 |  |
| P22 | | F | 37 | Hydrocephalus  Epilepsy  Intracranial infection | 6.8 | I | SCF/LZD | *-* | 3.5 |  | 60.3 |
| P23 | | M | 33 | Perianal abscess | 0.2 | R | - | *-* | 7.2 | 19 | 59 |
| P24 | | F | 87 | Choledocholithiasis with acute cholangitis | 4.4 | R | SCF | *-* | 4.9 | 10 | 58.3 |
| P25 | | M | 56 | Non-Hodgkin's lymphoma  Cytomegalovirus disease | 13.3 | I | TZP/MEM/TGC/  SCF/LZD/VA | *-* | 6 | 10 | 46.85 |
| P26 | | M | 61 | Multiple myeloma  Sepsis  Fracture | 7.6 | I | LEV/TZP | *A.pitti* | 1.65 | 10.5 | 75.2 |
| P27 | | F | 42 | Pregnancy complicated with leukemia | 2.5 | I | SCF/TZP/MEM | *-* | 7.9 | 25 | 67.7 |
| P28 | | M | 62 | Acute myeloid leukemia  Sepsis | 3 | I | MEM/LZD/CXM/  VA | *-* | 4.55 | 3 | 60.2 |
| P29 | | M | 37 | Acute cholangitis  Septicemia | 5.7 | I | MEM/CAZ/LEV | *K.pneumoniae*  *Enter.faeciumC.albicans* | 6.3 | 6.5 | 81.45 |
| P30 | | M | 64 | Acute suppurative cholangitis | 3 | I | CRO/CAZ/MEM | *K.pneumoniae* | 13.4 | 54 | 91.8 |
| P31 | | F | 84 | Acute suppurative cholangitis | 2.6 | R | CAZ/SCF/MEM | *Enter.faecium* | 5.15 | 114 | 88.45 |
| P32 | | M | 86 | Choledocholithiasis with cholangitis  Alzheimer's disease | 4.6 | I | SCF/CAZ | *-* | 6.7 | 4 | 70.9 |
| P33 | | F | 61 | Choledocholithiasis with acute cholecystitis | 1.5 | R | MEM | *-* | 12.3 | 89 | 77.4 |
| P34 | | M | 64 | Cholangiocarcinoma | 8.1 | I | CAZ/MEM | *K.pneumoniae* | 9.9 | 62 | 88 |
| P35 | | F | 83 | Coronary atherosclerotic heart disease | 2.3 | T | Unknown | *-* | 11.7 |  | 80.4 |
| P36 | | F | 67 | Septicemia | 1.6 | I | LZD | *K.pneumoniae* | 9.8 | 215 | 79.7 |
| P37 | | M | 83 | Pneumonia | 22.5 | D | FOX/SCF/TGC/MEM | *Enter.faecium* | 17.63 | 20.67 | 94.23 |
| P38 | | M | 46 | Colon cancer | 3.2 | I | CAZ/MEM | *-* | 6.9 | 116 | 79.2 |

a: In units of ten thousand yuan. b: I , R, D represents improved, recovered and died, respectively. c: antibiotic usage two months prior admission.

WBC: white blood cell. CRP: c-reactive protein. N: neutrophils percent.

TZP: piperacillin/tazobactam. SMZ: sulfamethoxazole-trimethoprim. LEV: levofloxacin. SCF: cefoperazone/sulbactam, CAZ: ceftazidime, AZM: azithromycin, AMC: amoxicillin/clavulanic acid, CRO: ceftriaxone, LZD: linezolid, PRL: piperacillin, DAP: daptomycin, TEC: teicoplanin, CXM: cefuroxime, MTZ: metronidazole, MEM: meropenem, TGC: tigecycline, ETM: itimicin, MOX: latamoxef, FLU: fluconazole, VA: vancomycin, FOX: cefoxitin.
